# Supplementary material
Source: HighWire-hosted journal article supplement (https://www.cmaj.ca/highwire/filestream/81430/field_highwire_adjunct_files/4/211416-res-5-at.pdf)
Supplement: 211416-res-5-at.pdf [file 211416-res-5-at.pdf]

## Appendix 5 - Trends Over Time

### 1) All Practices

Figure: Inappropriate Health Care in Canada Over Time (All Practices)

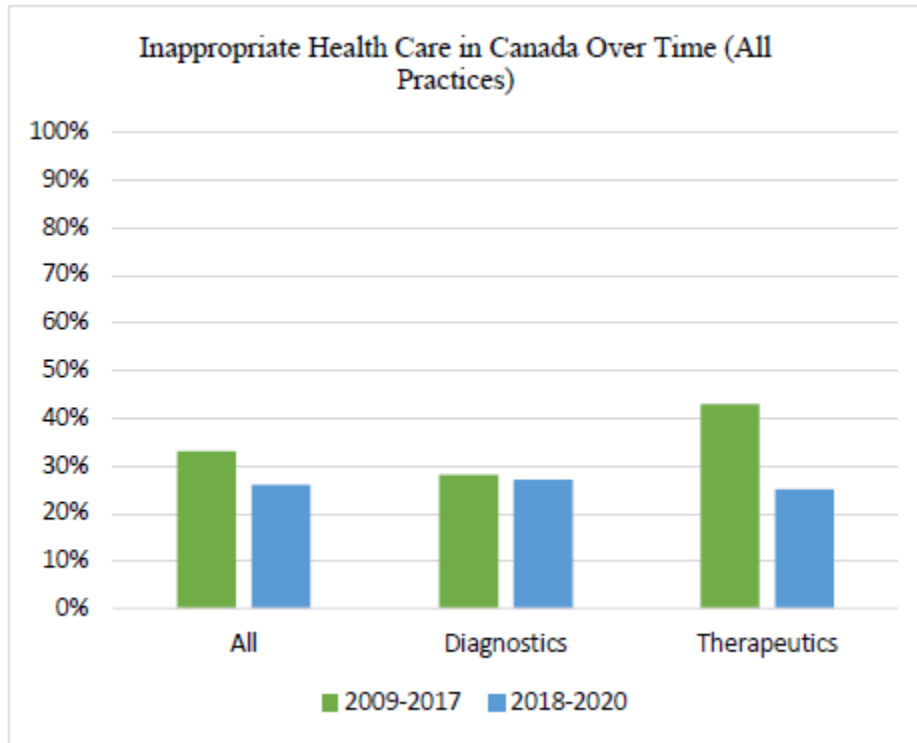

Figure: Inappropriate Health Care in Canada Over Time by Sub-category (All Practices)

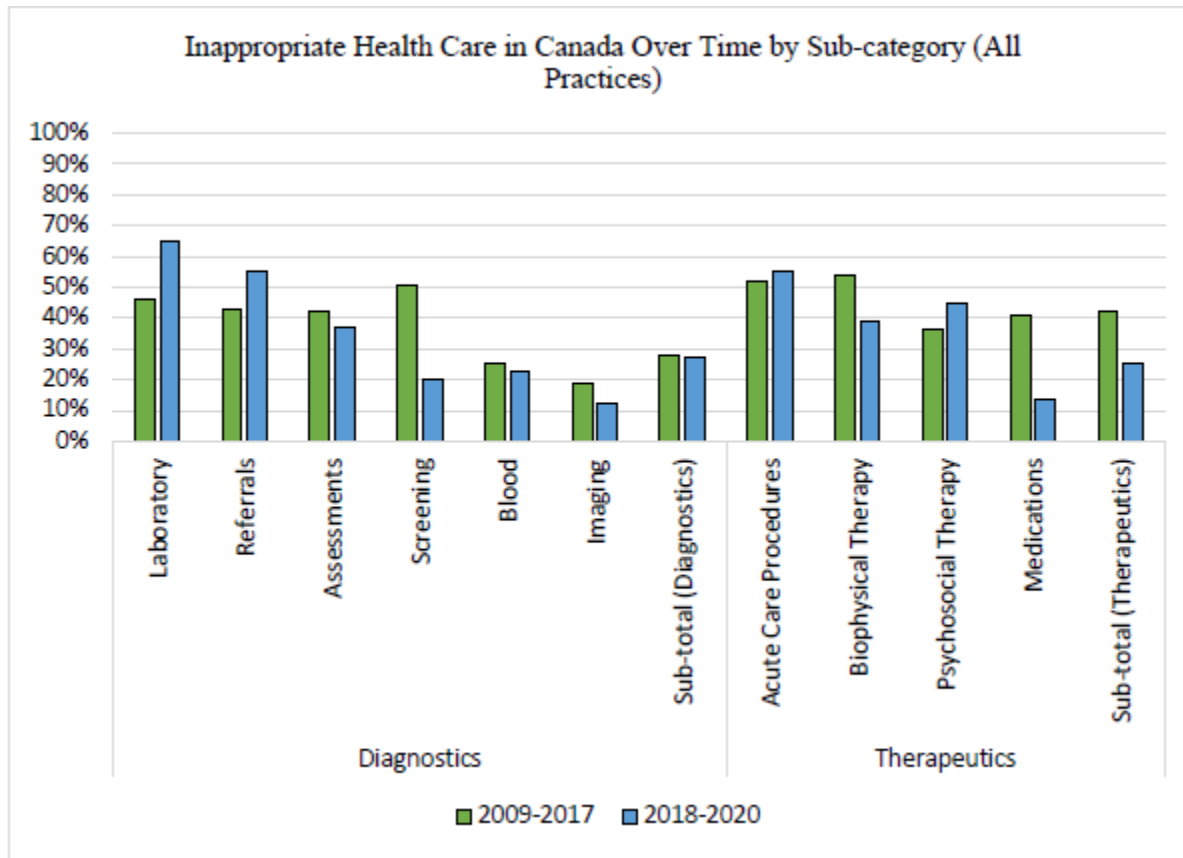

Table: Inappropriate Health Care in Canada Over Time (All Practices)

| Category of Care<br>(ALL) |                          | 2009-2017               |                            |                      | 2018-2020               |                            |                     |
|---------------------------|--------------------------|-------------------------|----------------------------|----------------------|-------------------------|----------------------------|---------------------|
|                           |                          | N<br>Total<br>Practices | N<br>Studies<br>(Findings) | Median<br>(IQR)      | N<br>Total<br>Practices | N<br>Studies<br>(Findings) | Median<br>(IQR)     |
| Diagnostics               | Laboratory               | 3                       | 5 (6)                      | 46% (31%-69%)        | 3                       | 4 (5)                      | 65% (17%-77%)       |
|                           | Referrals                | 6                       | 8 (10)                     | 43% (28%-63%)        | 3                       | 3 (3)                      | *55% (34%-55%)      |
|                           | Assessments              | 21                      | 22 (43)                    | 42% (22%-66%)        | 18                      | 9 (23)                     | 37% (29%-57%)       |
|                           | Screening                | 7                       | 9 (9)                      | 51% (11%-76%)        | 7                       | 8 (12)                     | 20% (6%-63%)        |
|                           | Blood                    | 16                      | 16 (41)                    | 25% (18%-41%)        | 14                      | 11(24)                     | 23% (4%-40%)        |
|                           | Imaging                  | 25                      | 23 (45)                    | 19% (5%-32%)         | 19                      | 10 (32)                    | 12% (3%-26%)        |
|                           | <i>Sub-total</i>         | 78                      | 52 (154)                   | 28% (17%-50%)        | 64                      | 35 (99)                    | 27% (7%-42%)        |
| Therapeutics              | Acute Care<br>Procedures | 7                       | 8 (9)                      | 52% (19%-90%)        | 4                       | 4 (7)                      | 55% (22%-65%)       |
|                           | Biophysical<br>Therapy   | 20                      | 14 (24)                    | 54% (18%-85%)        | 12                      | 14 (18)                    | 39% (18%-59%)       |
|                           | Psychosocial<br>Therapy  | 7                       | 8 (21)                     | 36% (18%-56%)        | 3                       | 3 (10)                     | 45% (33%-54%)       |
|                           | Medications              | 39                      | 38 (74)                    | 41% (19%-67%)        | 41                      | 32 (85)                    | 14% (2%-53%)        |
|                           | <i>Sub-total</i>         | 73                      | 58 (128)                   | 42% (19%-67%)        | 60                      | 50 (120)                   | 25% (4%-55%)        |
| <b>Total</b>              |                          | <b>151</b>              | <b>92 (282)</b>            | <b>33% (18%-59%)</b> | <b>124</b>              | <b>80 (219)</b>            | <b>26% (5%-52%)</b> |

\*Only 3 data points, range provided

Note:

- Multiple Diagnostics and Acute Care omitted, only one data point in 2018-2020
- Multiple Therapeutics removed only one data point in 2009-2017

## 2) Underused Practices

Figure: Inappropriate Health Care in Canada Over Time (Underuse)

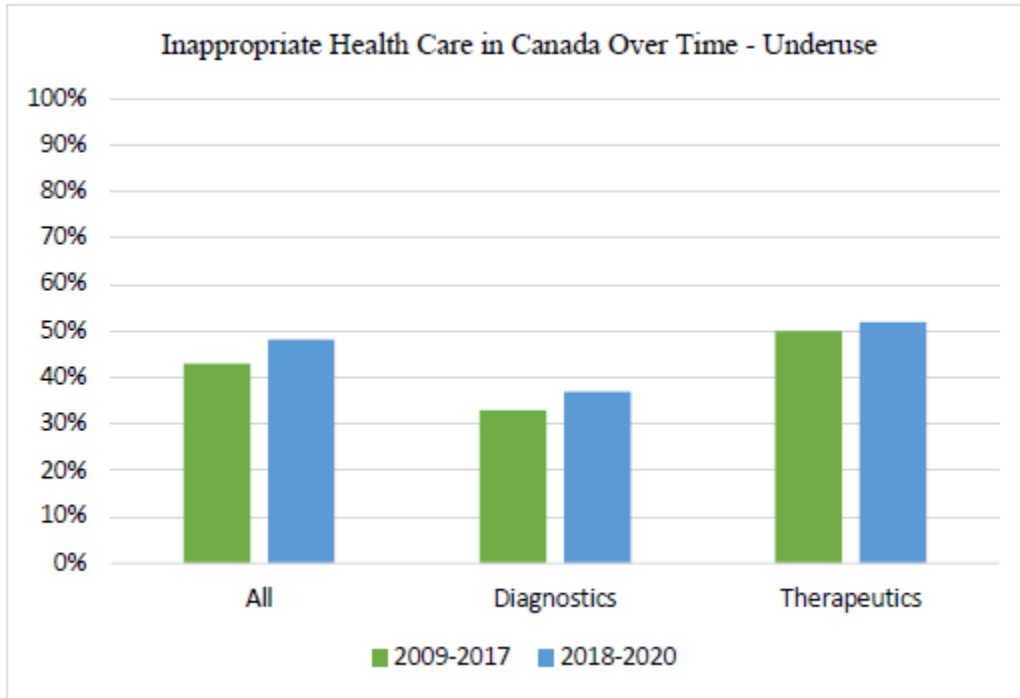

Figure: Inappropriate Health Care in Canada Over Time by Sub-category (Underuse)

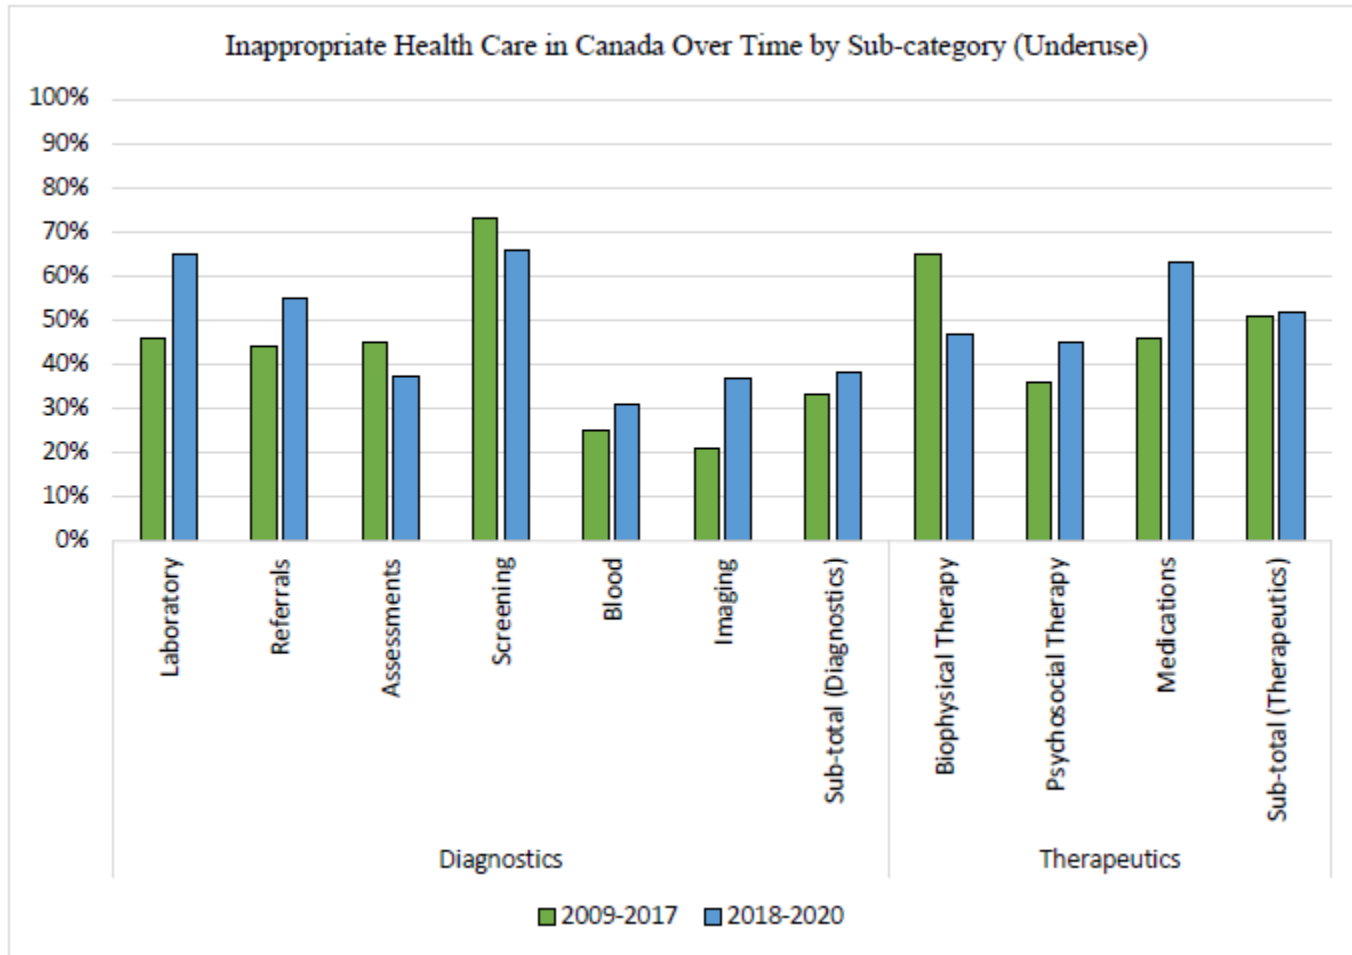

Table: Inappropriate Health Care in Canada Over Time (Underuse)

| Category of Care<br>(UNDERUSE) |                         | 2009-2017               |                            |                      | 2018-2020               |                            |                      |
|--------------------------------|-------------------------|-------------------------|----------------------------|----------------------|-------------------------|----------------------------|----------------------|
|                                |                         | N<br>Total<br>Practices | N<br>Studies<br>(Findings) | Median<br>(IQR)      | N<br>Total<br>Practices | N<br>Studies<br>(Findings) | Median<br>(IQR)      |
| Diagnostics                    | Laboratory              | 3                       | 5 (6)                      | 46% (31%-69%)        | 3                       | 4 (5)                      | 65% (17%-77%)        |
|                                | Referrals               | 5                       | 7 (8)                      | 44% (23%-76%)        | 3                       | 3(3)                       | 55% (-)              |
|                                | Assessments             | 17                      | 17 (37)                    | 45% (23%-66%)        | 17                      | 8 (22)                     | 37% (28%-60%)        |
|                                | Screening               | 5                       | 5 (5)                      | 73% (35%-86%)        | 3                       | 4 (5)                      | 66% (42%-84%)        |
|                                | Blood                   | 10                      | 10 (29)                    | 25% (19%-51%)        | 4                       | 4 (13)                     | 31% (17%-53%)        |
|                                | Imaging                 | 12                      | 12 (21)                    | 21% (11%-34%)        | 4                       | 3 (4)                      | 37% (-)              |
|                                | <i>Sub-total</i>        | <i>55</i>               | <i>32 (110)</i>            | <i>33% (20%-58%)</i> | <i>35</i>               | <i>20 (53)</i>             | <i>37% (27%-66%)</i> |
| Therapeutics                   | Biophysical<br>Therapy  | 12                      | 15 (15)                    | 65% (51%-93%)        | 8                       | 10 (13)                    | 47% (28%-61%)        |
|                                | Psychosocial<br>Therapy | 7                       | 8 (21)                     | 36% (18%-56%)        | 3                       | 3 (10)                     | 45% (33%-54%)        |
|                                | Medications             | 26                      | 21 (52)                    | 46% (21%-70%)        | 14                      | 14 (19)                    | 63% (37%-77%)        |
|                                | <i>Sub-total</i>        | <i>51</i>               | <i>34 (95)</i>             | <i>50% (24%-71%)</i> | <i>26</i>               | <i>27 (43)</i>             | <i>52% (34%-70%)</i> |
| <b>Total</b>                   |                         | <b>106</b>              | <b>53 (205)</b>            | <b>43% (21%-67%)</b> | <b>61</b>               | <b>42 (96)</b>             | <b>48% (29%-66%)</b> |

\*Only 3 data points, range provided

Note:

- Multiple Diagnostics and Acute Care omitted, only one data point in 2018-2020
- Multiple Therapeutics removed only one data point in 2009-2017

### 3) Overused Practices

Figure: Inappropriate Health Care in Canada Over Time (Overuse)

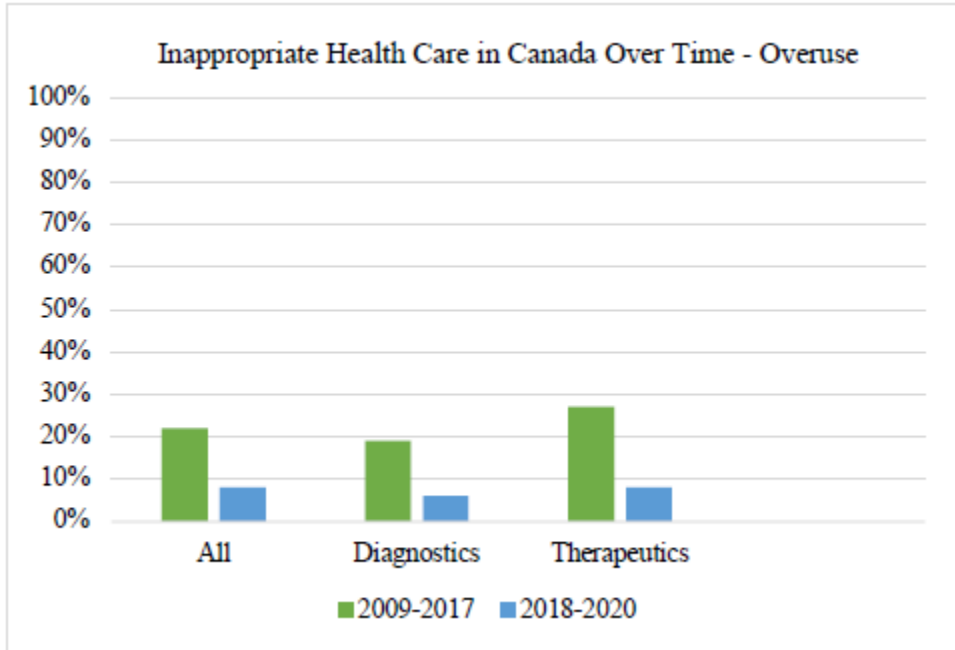

Figure: Inappropriate Health Care in Canada Over Time by Sub-category (Overuse)

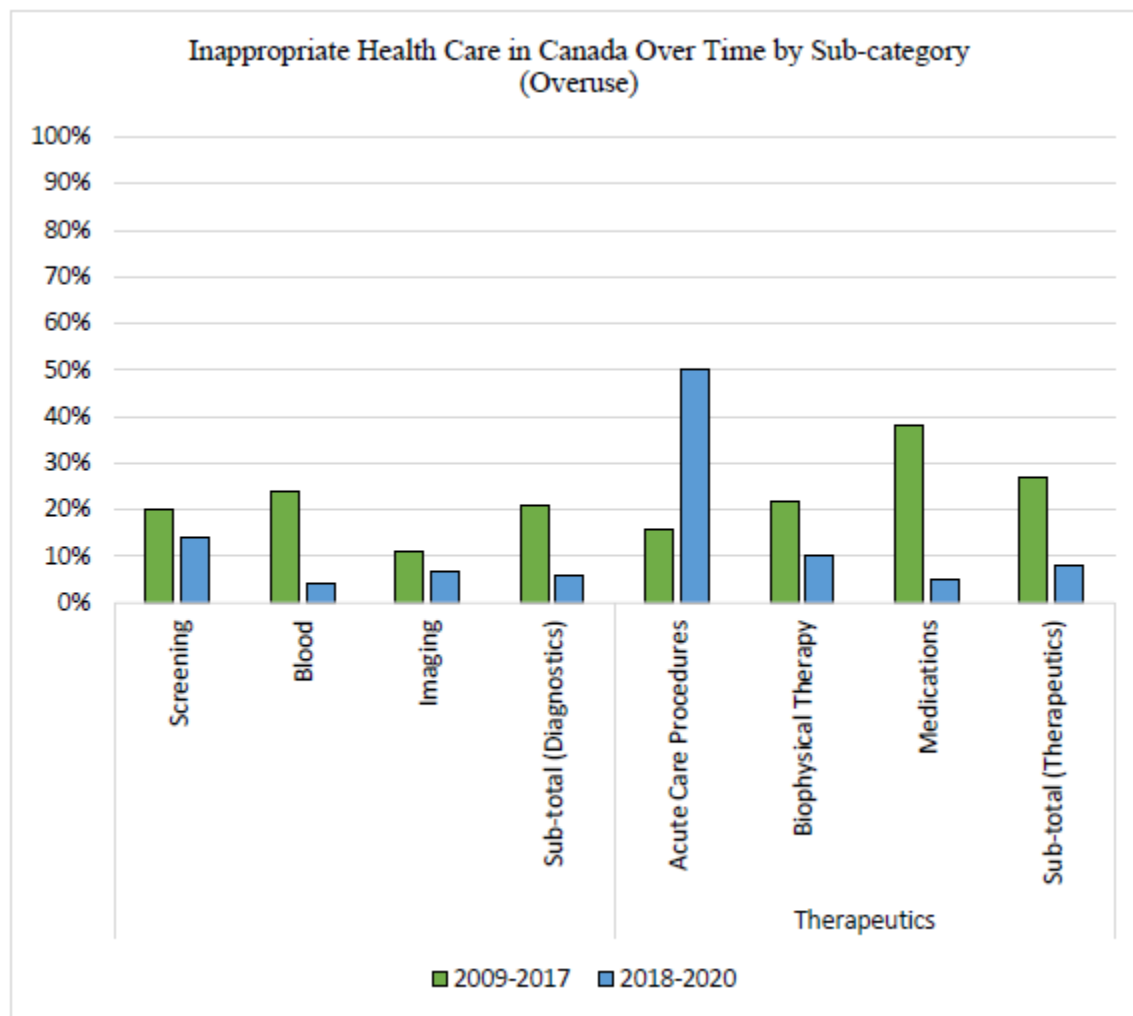



Table: Inappropriate Health Care in Canada Over Time (Overuse)

| Category of Care<br>(OVERUSE) |                          | 2009-2017               |                            |                      | 2018-2020               |                            |                    |
|-------------------------------|--------------------------|-------------------------|----------------------------|----------------------|-------------------------|----------------------------|--------------------|
|                               |                          | N<br>Total<br>Practices | N<br>Studies<br>(Findings) | Median<br>(IQR)      | N<br>Total<br>Practices | N<br>Studies<br>(Findings) | Median<br>(IQR)    |
| Diagnostics                   | Screening                | 3                       | 4 (4)                      | 20% (-)              | 4                       | 4 (7)                      | 14% (2%-18%)       |
|                               | Blood                    | 7                       | 6 (12)                     | 24% (12%-34%)        | 10                      | 7 (11)                     | 4% (1%-35%)        |
|                               | Imaging                  | 18                      | 12 (24)                    | 11% (3%-28%)         | 17                      | 9 (28)                     | 7% (3%-21%)        |
|                               | <i>Sub-total</i>         | <i>35</i>               | <i>25 (48)</i>             | <i>19% (7%-28%)</i>  | <i>32</i>               | <i>17 (47)</i>             | <i>6% (2%-22%)</i> |
| Therapeutics                  | Acute Care<br>Procedures | 2                       | 3 (3)                      | 16% (-)              | 3                       | 3 (6)                      | 50% (20%-60%)      |
|                               | Biophysical<br>Therapy   | 8                       | 8 (9)                      | 22% (5%-32%)         | 5                       | 4 (5)                      | 10% (4%-41%)       |
|                               | Medications              | 13                      | 18 (22)                    | 38% (12%-49%)        | 32                      | 21 (66)                    | 5% (1%-26%)        |
|                               | <i>Sub-total</i>         | <i>23</i>               | <i>29 (34)</i>             | <i>27% (11%-46%)</i> | <i>40</i>               | <i>26 (77)</i>             | <i>8% (1%-27%)</i> |
| <b>Total</b>                  |                          | <b>58</b>               | <b>52 (82)</b>             | <b>22% (7%-37%)</b>  | <b>43</b>               | <b>(124)</b>               | <b>8% (1%-26%)</b> |

\* Only 3 data points, range provided

Note:

- Laboratory, Multiple Diagnostics, Psychosocial Therapy, Multiple Therapeutics omitted, no data points for 2009-2017 and 2018-2020
- Referrals omitted because no data points 2018-2020
- Assessments omitted because only one data point 2018-2020
